# Supplementary material for: Detecting protein and post-translational modifications in single cells with iDentification and qUantification sEparaTion (DUET)
Source: Commun Biol. 2020 Aug 3;3:420. doi: 10.1038/s42003-020-01132-8 (PMC7400673; doi:10.1038/s42003-020-01132-8)
Supplement: Supplementary file 2 — Supplementary Data 1 [file 42003_2020_1132_MOESM2_ESM.xlsx]

## Sheet: Bridges
1st T7 ligation bridge		GACGAATTCGATGGCTTGACTTG
2nd T7 ligation bridge		ATGACAGGATGCGAACTGACTTGCTAAGTCTCAG

## Sheet: 1st T7
1st ligation oligos
Well position	Name	Sequence
A1	A1	/5Phos/CGAATTCGTC NNNNNNNNNNNNTTACCGACCTGAGACTTAGCAAGTC
A2	A2	/5Phos/CGAATTCGTC NNNNNNNNNNNNAGTGACCTCTGAGACTTAGCAAGTC
A3	A3	/5Phos/CGAATTCGTC NNNNNNNNNNNNTCGGATTCCTGAGACTTAGCAAGTC
A4	A4	/5Phos/CGAATTCGTC NNNNNNNNNNNNCAAGGTACCTGAGACTTAGCAAGTC
A5	A5	/5Phos/CGAATTCGTC NNNNNNNNNNNNTCCTCATGCTGAGACTTAGCAAGTC
A6	A6	/5Phos/CGAATTCGTC NNNNNNNNNNNNGTCAGTCACTGAGACTTAGCAAGTC
A7	A7	/5Phos/CGAATTCGTC NNNNNNNNNNNNCGAATACGCTGAGACTTAGCAAGTC
A8	A8	/5Phos/CGAATTCGTC NNNNNNNNNNNNTCTAGGAGCTGAGACTTAGCAAGTC
A9	A9	/5Phos/CGAATTCGTC NNNNNNNNNNNNCGCAACTACTGAGACTTAGCAAGTC
A10	A10	/5Phos/CGAATTCGTC NNNNNNNNNNNNCGTATCTCCTGAGACTTAGCAAGTC
A11	A11	/5Phos/CGAATTCGTC NNNNNNNNNNNNGTACACCTCTGAGACTTAGCAAGTC
A12	A12	/5Phos/CGAATTCGTC NNNNNNNNNNNNCGGCATTACTGAGACTTAGCAAGTC
B1	B1	/5Phos/CGAATTCGTC NNNNNNNNNNNNTCGTCTGACTGAGACTTAGCAAGTC
B2	B2	/5Phos/CGAATTCGTC NNNNNNNNNNNNAGCCTATCCTGAGACTTAGCAAGTC
B3	B3	/5Phos/CGAATTCGTC NNNNNNNNNNNNCTGTACCACTGAGACTTAGCAAGTC
B4	B4	/5Phos/CGAATTCGTC NNNNNNNNNNNNAGACCTTGCTGAGACTTAGCAAGTC
B5	B5	/5Phos/CGAATTCGTC NNNNNNNNNNNNAGGATAGCCTGAGACTTAGCAAGTC
B6	B6	/5Phos/CGAATTCGTC NNNNNNNNNNNNCCTTCCATCTGAGACTTAGCAAGTC
B7	B7	/5Phos/CGAATTCGTC NNNNNNNNNNNNGTCCTTGACTGAGACTTAGCAAGTC
B8	B8	/5Phos/CGAATTCGTC NNNNNNNNNNNNTGCGTAACCTGAGACTTAGCAAGTC
B9	B9	/5Phos/CGAATTCGTC NNNNNNNNNNNNCACAGACTCTGAGACTTAGCAAGTC
B10	B10	/5Phos/CGAATTCGTC NNNNNNNNNNNNTTACGTGCCTGAGACTTAGCAAGTC
B11	B11	/5Phos/CGAATTCGTC NNNNNNNNNNNNCCAAGGTTCTGAGACTTAGCAAGTC
B12	B12	/5Phos/CGAATTCGTC NNNNNNNNNNNNCACGCAATCTGAGACTTAGCAAGTC
C1	C1	/5Phos/CGAATTCGTC NNNNNNNNNNNNTTCCAGGTCTGAGACTTAGCAAGTC
C2	C2	/5Phos/CGAATTCGTC NNNNNNNNNNNNTCATCTCCCTGAGACTTAGCAAGTC
C3	C3	/5Phos/CGAATTCGTC NNNNNNNNNNNNGAGAGTACCTGAGACTTAGCAAGTC
C4	C4	/5Phos/CGAATTCGTC NNNNNNNNNNNNGTCGTTACCTGAGACTTAGCAAGTC
C5	C5	/5Phos/CGAATTCGTC NNNNNNNNNNNNGGAGGAATCTGAGACTTAGCAAGTC
C6	C6	/5Phos/CGAATTCGTC NNNNNNNNNNNNAGGAACACCTGAGACTTAGCAAGTC
C7	C7	/5Phos/CGAATTCGTC NNNNNNNNNNNNCAGTGCTTCTGAGACTTAGCAAGTC
C8	C8	/5Phos/CGAATTCGTC NNNNNNNNNNNNCTTGCTAGCTGAGACTTAGCAAGTC
C9	C9	/5Phos/CGAATTCGTC NNNNNNNNNNNNTGGAAGCACTGAGACTTAGCAAGTC
C10	C10	/5Phos/CGAATTCGTC NNNNNNNNNNNNAGCTAAGCCTGAGACTTAGCAAGTC
C11	C11	/5Phos/CGAATTCGTC NNNNNNNNNNNNGAACGGTTCTGAGACTTAGCAAGTC
C12	C12	/5Phos/CGAATTCGTC NNNNNNNNNNNNGGAATGTCCTGAGACTTAGCAAGTC
D1	D1	/5Phos/CGAATTCGTC NNNNNNNNNNNNTACGGTCTCTGAGACTTAGCAAGTC
D2	D2	/5Phos/CGAATTCGTC NNNNNNNNNNNNCCAGTATCCTGAGACTTAGCAAGTC
D3	D3	/5Phos/CGAATTCGTC NNNNNNNNNNNNTCTACGCACTGAGACTTAGCAAGTC
D4	D4	/5Phos/CGAATTCGTC NNNNNNNNNNNNGTAACCGACTGAGACTTAGCAAGTC
D5	D5	/5Phos/CGAATTCGTC NNNNNNNNNNNNGACGTCATCTGAGACTTAGCAAGTC
D6	D6	/5Phos/CGAATTCGTC NNNNNNNNNNNNCTTACAGCCTGAGACTTAGCAAGTC
D7	D7	/5Phos/CGAATTCGTC NNNNNNNNNNNNTCCATTGCCTGAGACTTAGCAAGTC
D8	D8	/5Phos/CGAATTCGTC NNNNNNNNNNNNAGCGAGATCTGAGACTTAGCAAGTC
D9	D9	/5Phos/CGAATTCGTC NNNNNNNNNNNNCAATAGCCCTGAGACTTAGCAAGTC
D10	D10	/5Phos/CGAATTCGTC NNNNNNNNNNNNAAGACACCCTGAGACTTAGCAAGTC
D11	D11	/5Phos/CGAATTCGTC NNNNNNNNNNNNCCAGTTGACTGAGACTTAGCAAGTC
D12	D12	/5Phos/CGAATTCGTC NNNNNNNNNNNNTGGTGAAGCTGAGACTTAGCAAGTC
E1	E1	/5Phos/CGAATTCGTC NNNNNNNNNNNNAAGACCGTCTGAGACTTAGCAAGTC
E2	E2	/5Phos/CGAATTCGTC NNNNNNNNNNNNTTGCGAGACTGAGACTTAGCAAGTC
E3	E3	/5Phos/CGAATTCGTC NNNNNNNNNNNNGCAATTCCCTGAGACTTAGCAAGTC
E4	E4	/5Phos/CGAATTCGTC NNNNNNNNNNNNGAATCCGTCTGAGACTTAGCAAGTC
E5	E5	/5Phos/CGAATTCGTC NNNNNNNNNNNNCCGCTTAACTGAGACTTAGCAAGTC
E6	E6	/5Phos/CGAATTCGTC NNNNNNNNNNNNTACCTGCACTGAGACTTAGCAAGTC
E7	E7	/5Phos/CGAATTCGTC NNNNNNNNNNNNGTCGATTGCTGAGACTTAGCAAGTC
E8	E8	/5Phos/CGAATTCGTC NNNNNNNNNNNNTATGGCACCTGAGACTTAGCAAGTC
E9	E9	/5Phos/CGAATTCGTC NNNNNNNNNNNNCTCGAACACTGAGACTTAGCAAGTC
E10	E10	/5Phos/CGAATTCGTC NNNNNNNNNNNNCAACTCCACTGAGACTTAGCAAGTC
E11	E11	/5Phos/CGAATTCGTC NNNNNNNNNNNNGTCATCGTCTGAGACTTAGCAAGTC
E12	E12	/5Phos/CGAATTCGTC NNNNNNNNNNNNGGACATCACTGAGACTTAGCAAGTC
F1	F1	/5Phos/CGAATTCGTC NNNNNNNNNNNNCAGGTTCACTGAGACTTAGCAAGTC
F2	F2	/5Phos/CGAATTCGTC NNNNNNNNNNNNGAACGAAGCTGAGACTTAGCAAGTC
F3	F3	/5Phos/CGAATTCGTC NNNNNNNNNNNNCTCAGAAGCTGAGACTTAGCAAGTC
F4	F4	/5Phos/CGAATTCGTC NNNNNNNNNNNNCATGAGCACTGAGACTTAGCAAGTC
F5	F5	/5Phos/CGAATTCGTC NNNNNNNNNNNNGACGAACTCTGAGACTTAGCAAGTC
F6	F6	/5Phos/CGAATTCGTC NNNNNNNNNNNNAGACGCTACTGAGACTTAGCAAGTC
F7	F7	/5Phos/CGAATTCGTC NNNNNNNNNNNNATAACGCCCTGAGACTTAGCAAGTC
F8	F8	/5Phos/CGAATTCGTC NNNNNNNNNNNNGAATCACCCTGAGACTTAGCAAGTC
F9	F9	/5Phos/CGAATTCGTC NNNNNNNNNNNNGGCAAGTTCTGAGACTTAGCAAGTC
F10	F10	/5Phos/CGAATTCGTC NNNNNNNNNNNNGATCTTGCCTGAGACTTAGCAAGTC
F11	F11	/5Phos/CGAATTCGTC NNNNNNNNNNNNCAATGCGACTGAGACTTAGCAAGTC
F12	F12	/5Phos/CGAATTCGTC NNNNNNNNNNNNGGTGTACACTGAGACTTAGCAAGTC
G1	G1	/5Phos/CGAATTCGTC NNNNNNNNNNNNTAGGAGCTCTGAGACTTAGCAAGTC
G2	G2	/5Phos/CGAATTCGTC NNNNNNNNNNNNCGAATTGCCTGAGACTTAGCAAGTC
G3	G3	/5Phos/CGAATTCGTC NNNNNNNNNNNNGTCCTAAGCTGAGACTTAGCAAGTC
G4	G4	/5Phos/CGAATTCGTC NNNNNNNNNNNNCTTAGGACCTGAGACTTAGCAAGTC
G5	G5	/5Phos/CGAATTCGTC NNNNNNNNNNNNTCCACGTTCTGAGACTTAGCAAGTC
G6	G6	/5Phos/CGAATTCGTC NNNNNNNNNNNNCAACACAGCTGAGACTTAGCAAGTC
G7	G7	/5Phos/CGAATTCGTC NNNNNNNNNNNNGCCTTAACCTGAGACTTAGCAAGTC
G8	G8	/5Phos/CGAATTCGTC NNNNNNNNNNNNGTAAGGTGCTGAGACTTAGCAAGTC
G9	G9	/5Phos/CGAATTCGTC NNNNNNNNNNNNAGCTACCACTGAGACTTAGCAAGTC
G10	G10	/5Phos/CGAATTCGTC NNNNNNNNNNNNCTTCACTGCTGAGACTTAGCAAGTC
G11	G11	/5Phos/CGAATTCGTC NNNNNNNNNNNNGGTTGAACCTGAGACTTAGCAAGTC
G12	G12	/5Phos/CGAATTCGTC NNNNNNNNNNNNGATAGCCACTGAGACTTAGCAAGTC
H1	H1	/5Phos/CGAATTCGTC NNNNNNNNNNNNTACTCCAGCTGAGACTTAGCAAGTC
H2	H2	/5Phos/CGAATTCGTC NNNNNNNNNNNNGGAAGAGACTGAGACTTAGCAAGTC
H3	H3	/5Phos/CGAATTCGTC NNNNNNNNNNNNGCGTTAGACTGAGACTTAGCAAGTC
H4	H4	/5Phos/CGAATTCGTC NNNNNNNNNNNNATCTGACCCTGAGACTTAGCAAGTC
H5	H5	/5Phos/CGAATTCGTC NNNNNNNNNNNNAACCAGAGCTGAGACTTAGCAAGTC
H6	H6	/5Phos/CGAATTCGTC NNNNNNNNNNNNGTACCACACTGAGACTTAGCAAGTC
H7	H7	/5Phos/CGAATTCGTC NNNNNNNNNNNNGGTATAGGCTGAGACTTAGCAAGTC
H8	H8	/5Phos/CGAATTCGTC NNNNNNNNNNNNCGAGAGAACTGAGACTTAGCAAGTC
H9	H9	/5Phos/CGAATTCGTC NNNNNNNNNNNNCAGCATACCTGAGACTTAGCAAGTC
H10	H10	/5Phos/CGAATTCGTC NNNNNNNNNNNNCTCGACTTCTGAGACTTAGCAAGTC
H11	H11	/5Phos/CGAATTCGTC NNNNNNNNNNNNCTTCGGTTCTGAGACTTAGCAAGTC
H12	H12	/5Phos/CGAATTCGTC NNNNNNNNNNNNCCACAACACTGAGACTTAGCAAGTC

## Sheet: 2nd T7
2nd ligation oligos
Well position	Name	Sequence
A1	A1	/5Phos/AGTTCGCATCCTGTCATTTACCGACACTATCCTACTCACCATCCT
A2	A2	/5Phos/AGTTCGCATCCTGTCATAGTGACCTACTATCCTACTCACCATCCT
A3	A3	/5Phos/AGTTCGCATCCTGTCATTCGGATTCACTATCCTACTCACCATCCT
A4	A4	/5Phos/AGTTCGCATCCTGTCATCAAGGTACACTATCCTACTCACCATCCT
A5	A5	/5Phos/AGTTCGCATCCTGTCATTCCTCATGACTATCCTACTCACCATCCT
A6	A6	/5Phos/AGTTCGCATCCTGTCATGTCAGTCAACTATCCTACTCACCATCCT
A7	A7	/5Phos/AGTTCGCATCCTGTCATCGAATACGACTATCCTACTCACCATCCT
A8	A8	/5Phos/AGTTCGCATCCTGTCATTCTAGGAGACTATCCTACTCACCATCCT
A9	A9	/5Phos/AGTTCGCATCCTGTCATCGCAACTAACTATCCTACTCACCATCCT
A10	A10	/5Phos/AGTTCGCATCCTGTCATCGTATCTCACTATCCTACTCACCATCCT
A11	A11	/5Phos/AGTTCGCATCCTGTCATGTACACCTACTATCCTACTCACCATCCT
A12	A12	/5Phos/AGTTCGCATCCTGTCATCGGCATTAACTATCCTACTCACCATCCT
B1	B1	/5Phos/AGTTCGCATCCTGTCATTCGTCTGAACTATCCTACTCACCATCCT
B2	B2	/5Phos/AGTTCGCATCCTGTCATAGCCTATCACTATCCTACTCACCATCCT
B3	B3	/5Phos/AGTTCGCATCCTGTCATCTGTACCAACTATCCTACTCACCATCCT
B4	B4	/5Phos/AGTTCGCATCCTGTCATAGACCTTGACTATCCTACTCACCATCCT
B5	B5	/5Phos/AGTTCGCATCCTGTCATAGGATAGCACTATCCTACTCACCATCCT
B6	B6	/5Phos/AGTTCGCATCCTGTCATCCTTCCATACTATCCTACTCACCATCCT
B7	B7	/5Phos/AGTTCGCATCCTGTCATGTCCTTGAACTATCCTACTCACCATCCT
B8	B8	/5Phos/AGTTCGCATCCTGTCATTGCGTAACACTATCCTACTCACCATCCT
B9	B9	/5Phos/AGTTCGCATCCTGTCATCACAGACTACTATCCTACTCACCATCCT
B10	B10	/5Phos/AGTTCGCATCCTGTCATTTACGTGCACTATCCTACTCACCATCCT
B11	B11	/5Phos/AGTTCGCATCCTGTCATCCAAGGTTACTATCCTACTCACCATCCT
B12	B12	/5Phos/AGTTCGCATCCTGTCATCACGCAATACTATCCTACTCACCATCCT
C1	C1	/5Phos/AGTTCGCATCCTGTCATTTCCAGGTACTATCCTACTCACCATCCT
C2	C2	/5Phos/AGTTCGCATCCTGTCATTCATCTCCACTATCCTACTCACCATCCT
C3	C3	/5Phos/AGTTCGCATCCTGTCATGAGAGTACACTATCCTACTCACCATCCT
C4	C4	/5Phos/AGTTCGCATCCTGTCATGTCGTTACACTATCCTACTCACCATCCT
C5	C5	/5Phos/AGTTCGCATCCTGTCATGGAGGAATACTATCCTACTCACCATCCT
C6	C6	/5Phos/AGTTCGCATCCTGTCATAGGAACACACTATCCTACTCACCATCCT
C7	C7	/5Phos/AGTTCGCATCCTGTCATCAGTGCTTACTATCCTACTCACCATCCT
C8	C8	/5Phos/AGTTCGCATCCTGTCATCTTGCTAGACTATCCTACTCACCATCCT
C9	C9	/5Phos/AGTTCGCATCCTGTCATTGGAAGCAACTATCCTACTCACCATCCT
C10	C10	/5Phos/AGTTCGCATCCTGTCATAGCTAAGCACTATCCTACTCACCATCCT
C11	C11	/5Phos/AGTTCGCATCCTGTCATGAACGGTTACTATCCTACTCACCATCCT
C12	C12	/5Phos/AGTTCGCATCCTGTCATGGAATGTCACTATCCTACTCACCATCCT
D1	D1	/5Phos/AGTTCGCATCCTGTCATTACGGTCTACTATCCTACTCACCATCCT
D2	D2	/5Phos/AGTTCGCATCCTGTCATCCAGTATCACTATCCTACTCACCATCCT
D3	D3	/5Phos/AGTTCGCATCCTGTCATTCTACGCAACTATCCTACTCACCATCCT
D4	D4	/5Phos/AGTTCGCATCCTGTCATGTAACCGAACTATCCTACTCACCATCCT
D5	D5	/5Phos/AGTTCGCATCCTGTCATGACGTCATACTATCCTACTCACCATCCT
D6	D6	/5Phos/AGTTCGCATCCTGTCATCTTACAGCACTATCCTACTCACCATCCT
D7	D7	/5Phos/AGTTCGCATCCTGTCATTCCATTGCACTATCCTACTCACCATCCT
D8	D8	/5Phos/AGTTCGCATCCTGTCATAGCGAGATACTATCCTACTCACCATCCT
D9	D9	/5Phos/AGTTCGCATCCTGTCATCAATAGCCACTATCCTACTCACCATCCT
D10	D10	/5Phos/AGTTCGCATCCTGTCATAAGACACCACTATCCTACTCACCATCCT
D11	D11	/5Phos/AGTTCGCATCCTGTCATCCAGTTGAACTATCCTACTCACCATCCT
D12	D12	/5Phos/AGTTCGCATCCTGTCATTGGTGAAGACTATCCTACTCACCATCCT
E1	E1	/5Phos/AGTTCGCATCCTGTCATAAGACCGTACTATCCTACTCACCATCCT
E2	E2	/5Phos/AGTTCGCATCCTGTCATTTGCGAGAACTATCCTACTCACCATCCT
E3	E3	/5Phos/AGTTCGCATCCTGTCATGCAATTCCACTATCCTACTCACCATCCT
E4	E4	/5Phos/AGTTCGCATCCTGTCATGAATCCGTACTATCCTACTCACCATCCT
E5	E5	/5Phos/AGTTCGCATCCTGTCATCCGCTTAAACTATCCTACTCACCATCCT
E6	E6	/5Phos/AGTTCGCATCCTGTCATTACCTGCAACTATCCTACTCACCATCCT
E7	E7	/5Phos/AGTTCGCATCCTGTCATGTCGATTGACTATCCTACTCACCATCCT
E8	E8	/5Phos/AGTTCGCATCCTGTCATTATGGCACACTATCCTACTCACCATCCT
E9	E9	/5Phos/AGTTCGCATCCTGTCATCTCGAACAACTATCCTACTCACCATCCT
E10	E10	/5Phos/AGTTCGCATCCTGTCATCAACTCCAACTATCCTACTCACCATCCT
E11	E11	/5Phos/AGTTCGCATCCTGTCATGTCATCGTACTATCCTACTCACCATCCT
E12	E12	/5Phos/AGTTCGCATCCTGTCATGGACATCAACTATCCTACTCACCATCCT
F1	F1	/5Phos/AGTTCGCATCCTGTCATCAGGTTCAACTATCCTACTCACCATCCT
F2	F2	/5Phos/AGTTCGCATCCTGTCATGAACGAAGACTATCCTACTCACCATCCT
F3	F3	/5Phos/AGTTCGCATCCTGTCATCTCAGAAGACTATCCTACTCACCATCCT
F4	F4	/5Phos/AGTTCGCATCCTGTCATCATGAGCAACTATCCTACTCACCATCCT
F5	F5	/5Phos/AGTTCGCATCCTGTCATGACGAACTACTATCCTACTCACCATCCT
F6	F6	/5Phos/AGTTCGCATCCTGTCATAGACGCTAACTATCCTACTCACCATCCT
F7	F7	/5Phos/AGTTCGCATCCTGTCATATAACGCCACTATCCTACTCACCATCCT
F8	F8	/5Phos/AGTTCGCATCCTGTCATGAATCACCACTATCCTACTCACCATCCT
F9	F9	/5Phos/AGTTCGCATCCTGTCATGGCAAGTTACTATCCTACTCACCATCCT
F10	F10	/5Phos/AGTTCGCATCCTGTCATGATCTTGCACTATCCTACTCACCATCCT
F11	F11	/5Phos/AGTTCGCATCCTGTCATCAATGCGAACTATCCTACTCACCATCCT
F12	F12	/5Phos/AGTTCGCATCCTGTCATGGTGTACAACTATCCTACTCACCATCCT
G1	G1	/5Phos/AGTTCGCATCCTGTCATTAGGAGCTACTATCCTACTCACCATCCT
G2	G2	/5Phos/AGTTCGCATCCTGTCATCGAATTGCACTATCCTACTCACCATCCT
G3	G3	/5Phos/AGTTCGCATCCTGTCATGTCCTAAGACTATCCTACTCACCATCCT
G4	G4	/5Phos/AGTTCGCATCCTGTCATCTTAGGACACTATCCTACTCACCATCCT
G5	G5	/5Phos/AGTTCGCATCCTGTCATTCCACGTTACTATCCTACTCACCATCCT
G6	G6	/5Phos/AGTTCGCATCCTGTCATCAACACAGACTATCCTACTCACCATCCT
G7	G7	/5Phos/AGTTCGCATCCTGTCATGCCTTAACACTATCCTACTCACCATCCT
G8	G8	/5Phos/AGTTCGCATCCTGTCATGTAAGGTGACTATCCTACTCACCATCCT
G9	G9	/5Phos/AGTTCGCATCCTGTCATAGCTACCAACTATCCTACTCACCATCCT
G10	G10	/5Phos/AGTTCGCATCCTGTCATCTTCACTGACTATCCTACTCACCATCCT
G11	G11	/5Phos/AGTTCGCATCCTGTCATGGTTGAACACTATCCTACTCACCATCCT
G12	G12	/5Phos/AGTTCGCATCCTGTCATGATAGCCAACTATCCTACTCACCATCCT
H1	H1	/5Phos/AGTTCGCATCCTGTCATTACTCCAGACTATCCTACTCACCATCCT
H2	H2	/5Phos/AGTTCGCATCCTGTCATGGAAGAGAACTATCCTACTCACCATCCT
H3	H3	/5Phos/AGTTCGCATCCTGTCATGCGTTAGAACTATCCTACTCACCATCCT
H4	H4	/5Phos/AGTTCGCATCCTGTCATATCTGACCACTATCCTACTCACCATCCT
H5	H5	/5Phos/AGTTCGCATCCTGTCATAACCAGAGACTATCCTACTCACCATCCT
H6	H6	/5Phos/AGTTCGCATCCTGTCATGTACCACAACTATCCTACTCACCATCCT
H7	H7	/5Phos/AGTTCGCATCCTGTCATGGTATAGGACTATCCTACTCACCATCCT
H8	H8	/5Phos/AGTTCGCATCCTGTCATCGAGAGAAACTATCCTACTCACCATCCT
H9	H9	/5Phos/AGTTCGCATCCTGTCATCAGCATACACTATCCTACTCACCATCCT
H10	H10	/5Phos/AGTTCGCATCCTGTCATCTCGACTTACTATCCTACTCACCATCCT
H11	H11	/5Phos/AGTTCGCATCCTGTCATCTTCGGTTACTATCCTACTCACCATCCT
H12	H12	/5Phos/AGTTCGCATCCTGTCATCCACAACAACTATCCTACTCACCATCCT
